# Supplementary material for: Controlling ZIF-8 nano- and microcrystal formation and reactivity through zinc salt variations
Source: Royal Society of Chemistry journal article supplement (doi:10.1039/c3ce42485e), 2014-01-01
Supplement: c3ce42485e1.pdf [file c3ce42485e1.pdf]

## Supporting Information

### **Controlling ZIF-8 nano- and macrocrystal formation and reactivity through zinc salts variations**

Aleksandra Schejn, Lavinia Balan, Véronique Falk, Lionel Aranda, Ghouti Medjahdi, Raphaël Schneider

Université de Lorraine, Laboratoire Réactions et Génie des Procédés (LRGP), UMR 7274, CNRS, 1 rue Grandville, BP 20451, 54001 Nancy Cedex, France

Institut de Science des Matériaux de Mulhouse (IS2M), LRC 7228, 15 rue Jean Starcky, 68093 Mulhouse, France

Université de Lorraine, Institut Jean Lamour (IJL), UMR 7198, CNRS, BP 70239, 54506 Vandoeuvre-lès-Nancy Cedex, France

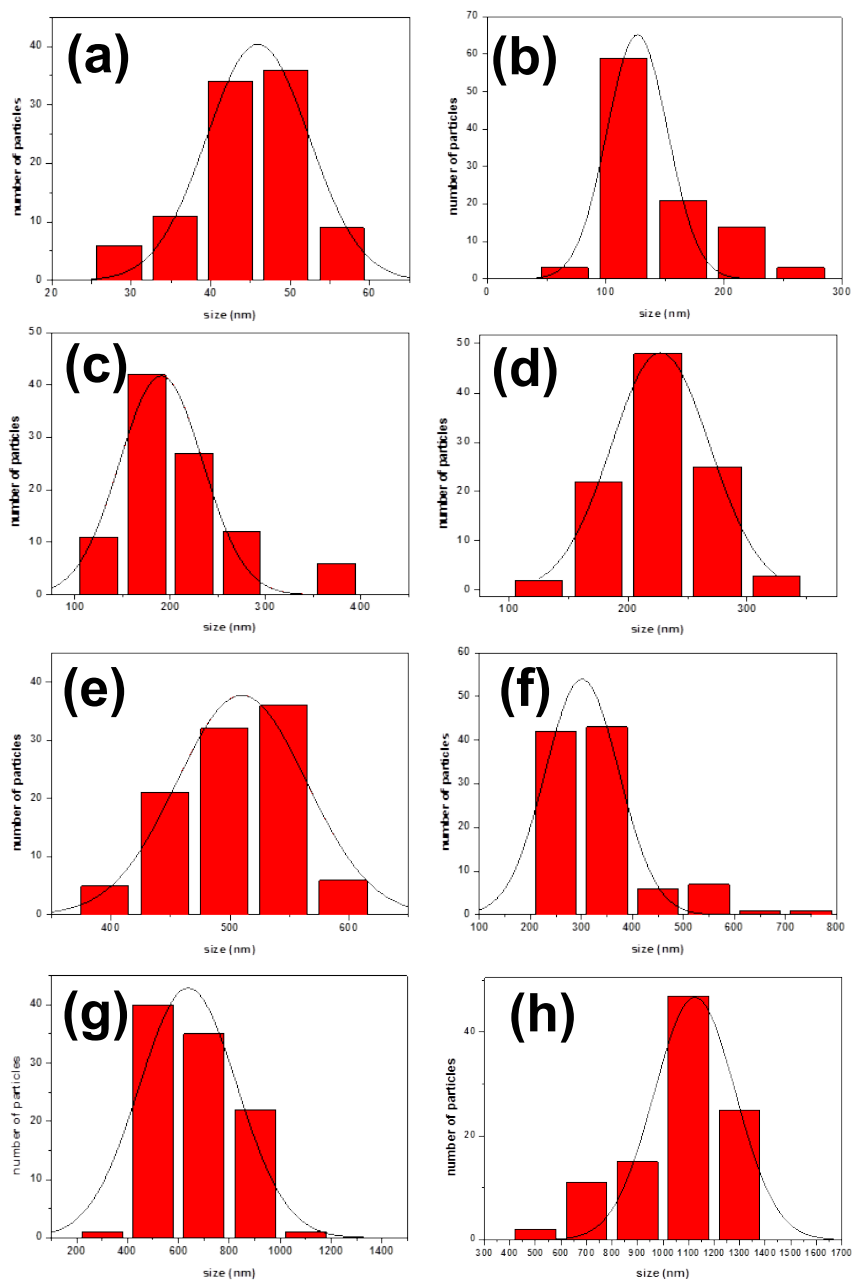

**Fig. S1.** Size distributions of ZIF-8 crystals obtained from SEM images described in Fig. 3.

### Zn(acac)<sub>2</sub>

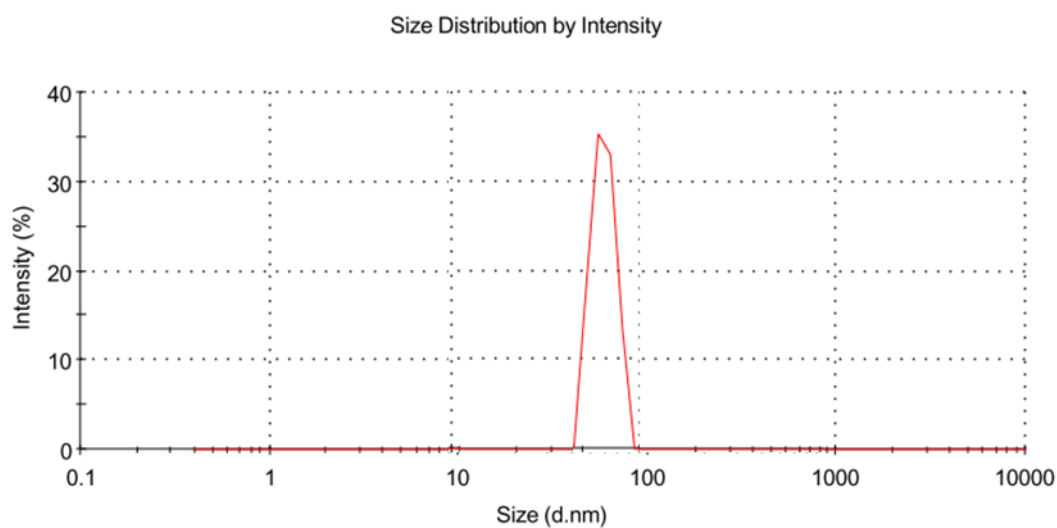

| Peak | Size [nm] | Intensity [%] | Width [nm] |
|------|-----------|---------------|------------|
| 1    | 85,0      | 100,0         | 21,58      |

### Zn(NO<sub>3</sub>)<sub>2</sub>

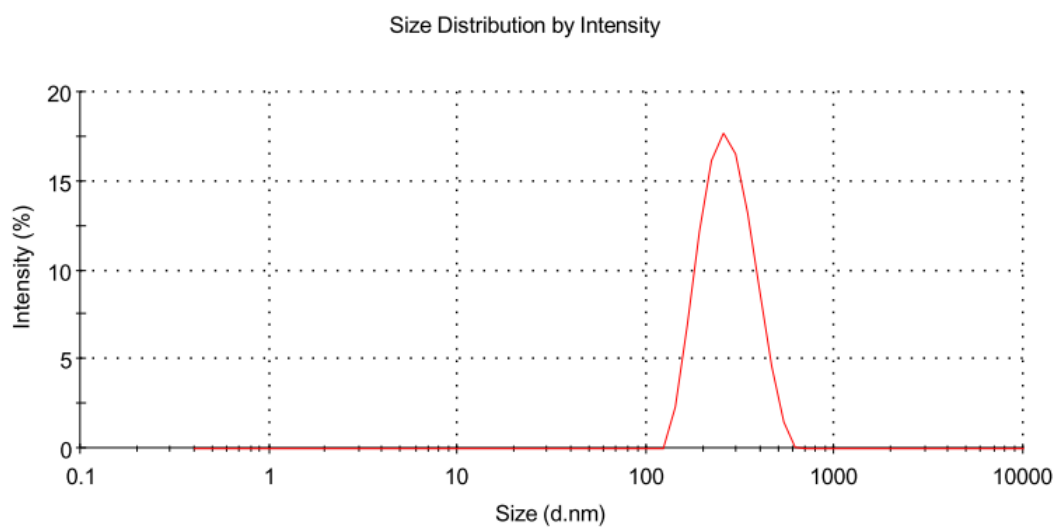

| Peak | Size [nm] | Intensity [%] | Width [nm] |
|------|-----------|---------------|------------|
| 1    | 192,0     | 100,0         | 85,31      |

**Fig. S2.** Size distributions by intensity obtained by DLS for ZIF-8 crystals prepared from Zn(acac)<sub>2</sub> and Zn(NO<sub>3</sub>)<sub>2</sub>.

## ZnSO<sub>4</sub>

Size Distribution by Intensity

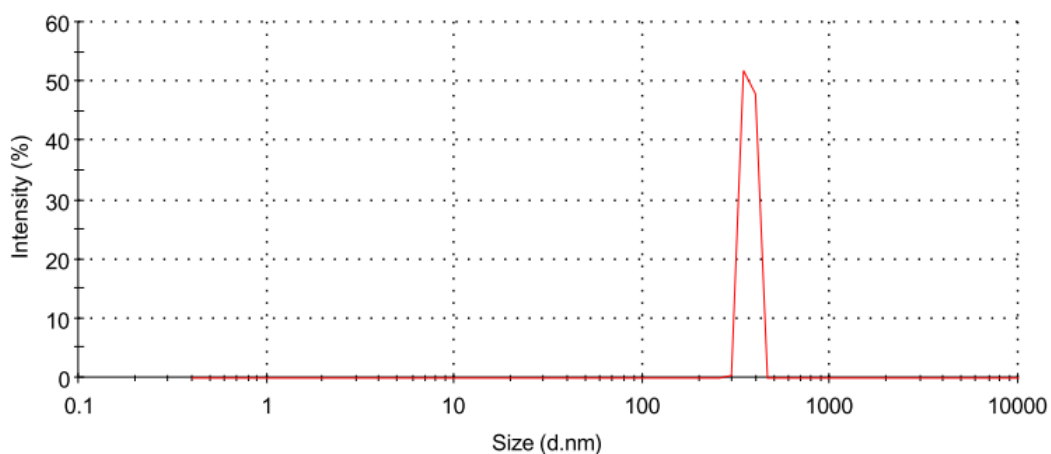

| Peak | Size [nm] | Intensity [%] | Width [nm] |
|------|-----------|---------------|------------|
| 1    | 247,0     | 100,0         | 27,38      |

## Zn(ClO<sub>4</sub>)<sub>2</sub>

Size Distribution by Intensity

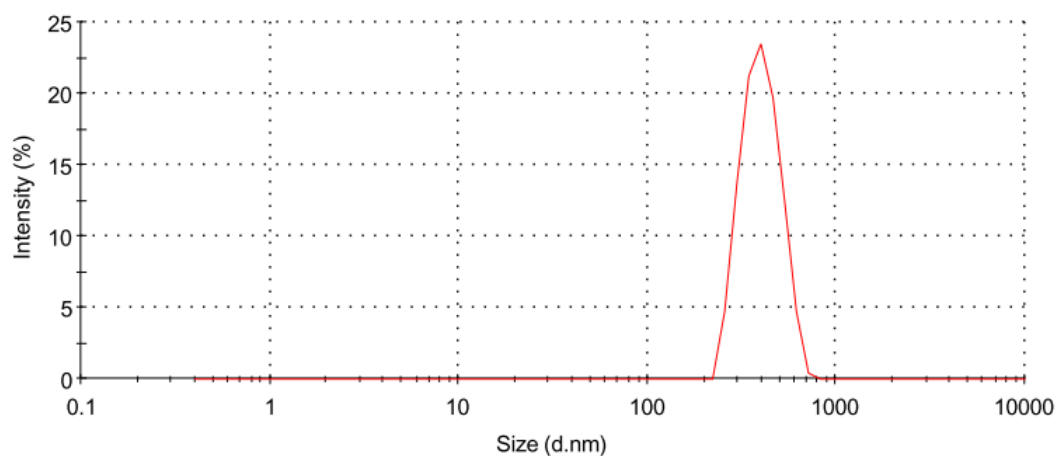

| Peak | Size [nm] | Intensity [%] | Width [nm] |
|------|-----------|---------------|------------|
| 1    | 312,0     | 100,0         | 92,42      |

**Fig. S2 (continued).** Size distributions by intensity obtained by DLS for ZIF-8 crystals prepared from ZnSO<sub>4</sub> and Zn(ClO<sub>4</sub>)<sub>2</sub>.

## Zn(OAc)<sub>2</sub>

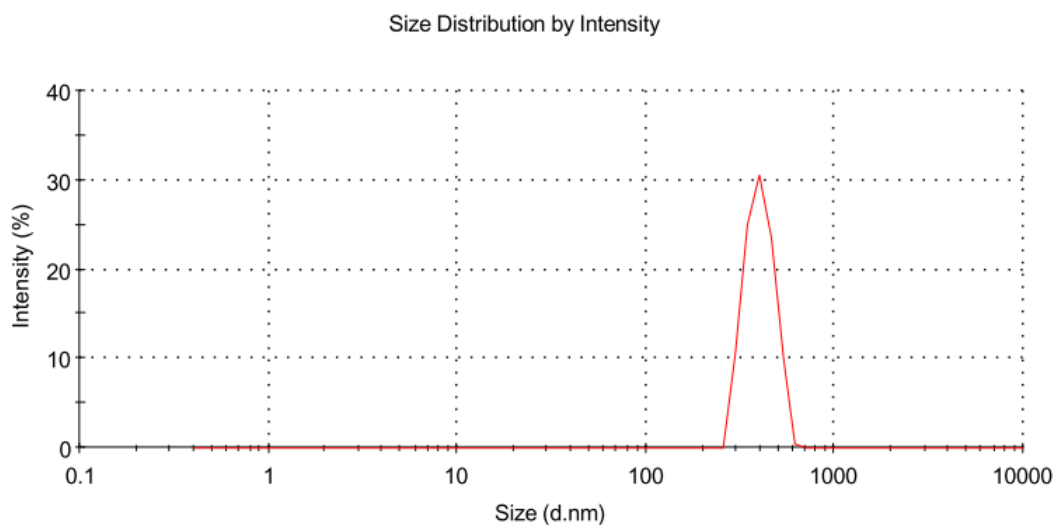

| Peak | Size [nm] | Intensity [%] | Width [nm] |
|------|-----------|---------------|------------|
| 1    | 480,0     | 100,0         | 62,78      |

## ZnCl<sub>2</sub>

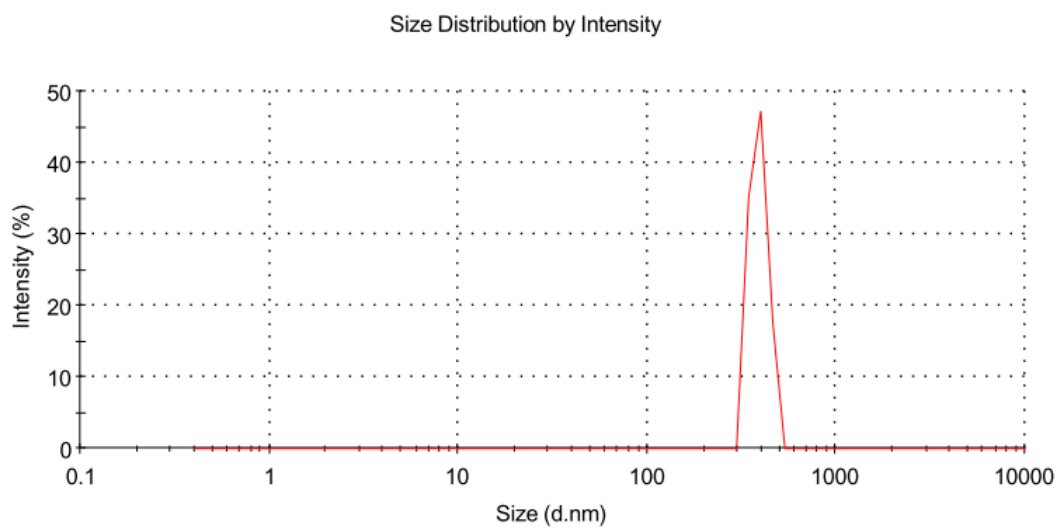

| Peak | Size [nm] | Intensity [%] | Width [nm] |
|------|-----------|---------------|------------|
| 1    | 388,0     | 100,0         | 40,69      |

**Fig. S2 (continued).** Size distributions by intensity obtained by DLS for ZIF-8 crystals prepared from Zn(OAc)<sub>2</sub> and ZnCl<sub>2</sub>.

## ZnI<sub>2</sub>

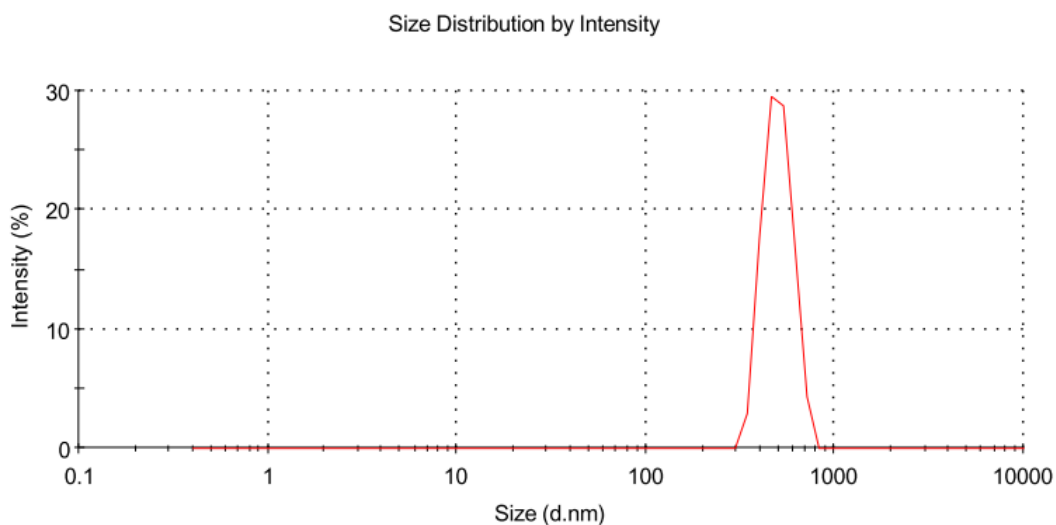

| Peak | Size [nm] | Intensity [%] | Width [nm] |
|------|-----------|---------------|------------|
| 1    | 589,0     | 100,0         | 87,26      |

## ZnBr<sub>2</sub>

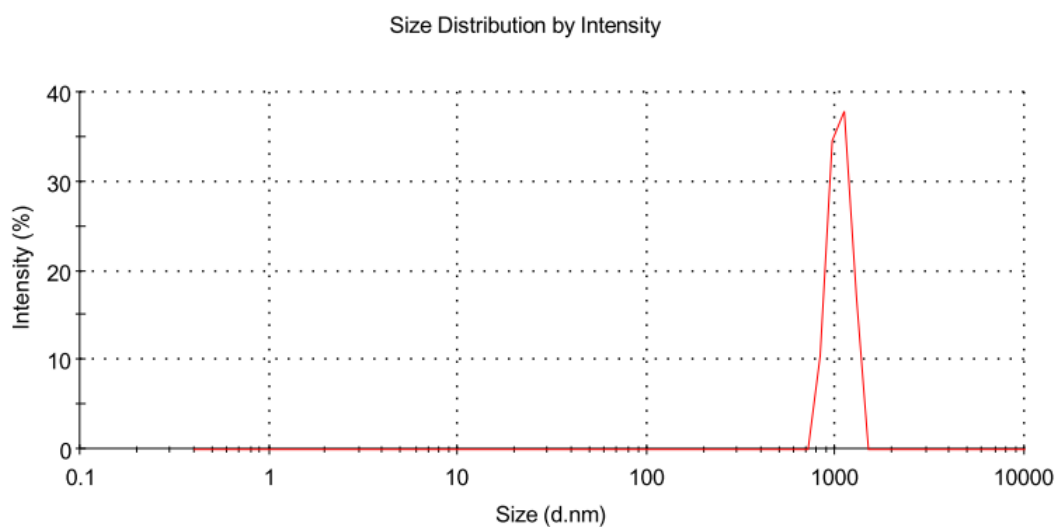

| Peak | Size [nm] | Intensity [%] | Width [nm] |
|------|-----------|---------------|------------|
| 1    | 1160,0    | 100,0         | 137,0      |

**Fig. S2 (continued).** Size distributions by intensity obtained by DLS for ZIF-8 crystals prepared from ZnI<sub>2</sub> and ZnBr<sub>2</sub>.

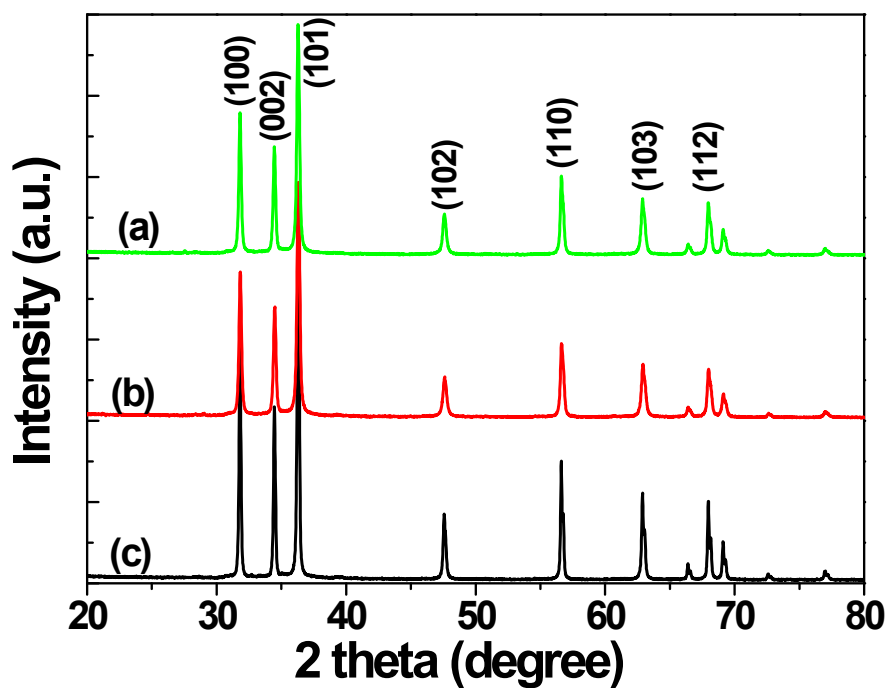

**Fig. S3.** XRD patterns of ZnO crystals obtained upon TGA experiments on ZIF-8 nanocrystals. (a) ZIF-8 prepared from zinc nitrate, (b) ZIF-8 prepared from zinc bromide, and (c) ZIF-8 prepared from zinc acetate.
